# Supplementary material for: Vegetation optimality explains the convergence of catchments on the Budyko curve
Source: Copernicus journal article supplement (doi:10.5194/hess-26-6289-2022), 2022-12-14
Supplement: Supplementary file 1 [file hess-26-6289-2022-supplement.zip]

Archive with 7 entries (7 files):
- S6_model_details.pdf
- S5_equations.pdf
- hess-26-6289-2022-supplement-title-page.pdf
- S4_dryness_index.pdf
- S3_catchment_data.pdf
- S2_VOM_meteo_incr.pdf
- S1_VOM_timeseries.pdf
