# Supplementary material for: Vegetation optimality explains the convergence of catchments on the Budyko curve
Source: Copernicus journal article supplement (doi:10.5194/hess-26-6289-2022), 2022-12-14
Supplement: Supplementary file 1 [file hess-26-6289-2022-supplement.zip › hess-26-6289-2022-supplement-title-page.pdf]

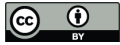

## *Supplement of*

# **Vegetation optimality explains the convergence of catchments on the Budyko curve**

**Remko C. Nijzink and Stanislaus J. Schymanski**

*Correspondence to:* Remko C. Nijzink ([remko\\_nijzink@live.nl](mailto:remko_nijzink@live.nl))

- [hess-26-6289-2022-supplement-title-page.pdf](#)
- [S1\\_VOM\\_timeseries.pdf](#)
- [S2\\_VOM\\_meteo\\_incr.pdf](#)
- [S3\\_catchment\\_data.pdf](#)
- [S4\\_dryness\\_index.pdf](#)
- [S5\\_equations.pdf](#)
- [S6\\_model\\_details.pdf](#)

The copyright of individual parts of the supplement might differ from the article licence.
