# Supplementary material for: Vegetation optimality explains the convergence of catchments on the Budyko curve
Source: Copernicus journal article supplement (doi:10.5194/hess-26-6289-2022), 2022-12-14
Supplement: Supplementary file 1 [file hess-26-6289-2022-supplement.zip › S6_model_details.pdf]

August 24, 2022

## 1 VOM Model Details

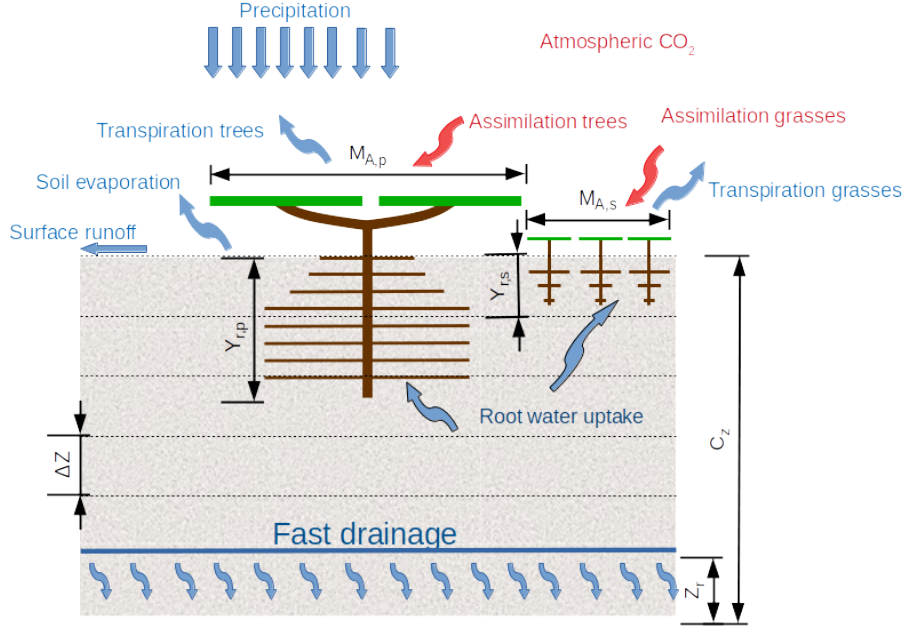

**Figure S6.1.** Schematization of the Vegetation Optimality Model as two big leaves (see also Nijzink et al. (2022)), with  $M_{A,p}$  and  $M_{A,s}$  the fractional cover of perennial trees and seasonal grasses respectively,  $y_{r,p}$  and  $y_{r,s}$  the rooting depths of the perennial trees and seasonal grasses respectively,  $\Delta Z$  the soil layer thickness,  $C_z$  the total soil depth, and  $Z_r$  the drainage depth.

The seasonal vegetation (grasses) and the perennial vegetation (trees) are represented in the VOM as two big leaves (see Figure S6.1). The photosynthesis of these leaves was modelled as a function of irradiance, atmospheric  $\text{CO}_2$ -concentrations, photosynthetic capacity and stomatal conductance von Caemmerer (2000); Schymanski et al. (2009):

$$A_g = \frac{1}{8} \left( 4C_a G_s + 8\Gamma_* G_s + \left( (J_e - 4R_l - 4G_s (C_a - 2\Gamma_*))^2 + 16G_s (8C_a G_s + J_e + 8R_l) \Gamma_* \right)^{\frac{1}{2}} \right) \quad (1)$$

with  $J_e$  the electron transport rate ( $\text{mol m}^{-2} \text{s}^{-1}$ ),  $G_s$  stomatal conductance ( $\text{mol m}^{-2} \text{s}^{-1}$ ),  $R_l$  leaf respiration ( $\text{mol m}^{-2} \text{s}^{-1}$ ),  $C_a$  the mole fraction of  $\text{CO}_2$  in the air and  $\Gamma_*$  the  $\text{CO}_2$  compensation point ( $\text{mol CO}_2 \text{ mol}^{-1} \text{air}$ ). The electron transport rate  $J_e$  is defined as:

$$J_e = \left( 1.0 - e^{\frac{0.3I_a}{J_{max}}} \right) \cdot J_{max} \cdot M_a \quad (2)$$

with  $I_a$  the irradiance ( $\text{mol m}^{-2} \text{s}^{-1}$ ),  $J_{max}$  the electron transport capacity ( $\text{mol m}^{-2} \text{s}^{-1}$ ) and  $M_a$  the projected cover of vegetation (dimensionless fraction). The leaf respiration  $R_l$  is:

$$R_l = \frac{M_a \cdot c_{Rl} \cdot J_{max} \cdot (C_a - \Gamma_*)}{8 \cdot (C_a + 2 \cdot \Gamma_*)} \quad (3)$$

15 with  $c_{Rl}$  a constant set to 0.07 (dimensionless).

The electron transport capacity  $J_{max}$  in Equations 2 and 3 is determined in the following way:

$$J_{max} = \frac{J_{max,25} \left( h_a \left( e^{-\frac{h_d(T_{opt}-298.0)}{273T_{opt}R+25.0}} - 1.0 \right) + h_d \right) e^{\frac{h_a(T_a-25.0)(273.0T_{opt}R+T_{opt}-273.0)}{(T_a+273.0T_{opt}R)(273.0T_{opt}R+25.0)}}}{h_a \left( e^{\frac{h_d(T_a-T_{opt}+273.0)}{T_a+273.0T_{opt}R}} - 1.0 \right) + h_d} \quad (4)$$

20 with  $h_a$  the rate of exponential increase of the function below the  $J_{max,25}$  and  $h_d$  the rate of exponential decrease of the function above  $J_{max,25}$ , set to 43.79 and 200 kJ mol<sup>-1</sup>, respectively.  $J_{max,25}$  is the electron transport capacity at 25 °C (mol m<sup>-2</sup> s<sup>-1</sup>) and  $T_{opt}$  the optimal temperature (K).

Root water uptake ( $Q_{r,i}$ , m/s), is modelled with the following equation:

$$Q_{r,i} = S_{A,r} \frac{h_{r,i} - h_i}{\Omega_r + \Omega_{s,i}} \quad (5)$$

with  $S_{A,r}$  the root surface area (m<sup>2</sup> m<sup>-2</sup>),  $h_{r,i}$  the hydraulic head in the roots (m),  $h_i$  the hydraulic head in the soil (m),  $\Omega_r$  the radial root resistivity (s) and  $\Omega_{s,i}$  the soil resistivity (s), with subscript  $i$  denoting the specific soil layer.

## 25 1.1 Carbon cost functions and Net Carbon Profit

Different carbon cost functions are defined in the VOM. The carbon cost related to foliage maintenance ( $R_f$ ) is a linear relation between the total leaf area and a constant leaf turnover cost factor:

$$R_f = L_{AIC} \cdot c_{tc} \cdot M_{A,p} \quad (6)$$

30 where  $L_{AIC}$  is the clumped leaf area index (LAI of vegetated area, set to a constant 2.5 based on Schymanski et al., 2007),  $c_{tc}$  is the leaf turnover cost factor (set to 0.22 μmol<sup>-1</sup> s<sup>-1</sup> m<sup>-2</sup>) and  $M_{A,p}$  is the perennial vegetation cover fraction.

The costs for root maintenance ( $R_r$ ) are:

$$R_r = c_{Rr} \cdot \left( \frac{r_r}{2} \cdot S_{A,r} \right) \quad (7)$$

where  $c_{Rr}$  is the respiration rate per fine root volume (0.0017 mol s<sup>-1</sup> m<sup>-3</sup>),  $r_r$  the root radius (set to 0.3\*10<sup>-3</sup> m).  $S_{A,r}$  represents the root surface area per unit ground area (m<sup>2</sup>m<sup>-2</sup>).

35 Water transport costs ( $R_v$ ) are a function of rooting depth and vegetated cover:

$$R_v = c_{rv} \cdot M_A \cdot y_r \quad (8)$$

where  $c_{rv}$  is the cost factor for water transport ( set to 1.0 μmol m<sup>-3</sup> s<sup>-1</sup>),  $M_A$  the fraction of vegetation cover (–), and  $y_r$  the rooting depth (m).

Based on the carbon cost functions and the assimilated carbon by photosynthesis ( $A_g$ ) the Net Carbon Profit is defined as:

40

$$NCP = \int (A_g(t) - R_f(t) - R_r(t) - R_v(t)) dt$$

(9)

with  $t$  representing the time step.

Several vegetation properties are optimized for maximum Net Carbon Profit. See Table S6.5 for the optimized vegetation properties.

**Table S6.1.** *Vegetation properties in the Vegetation Optimality Model optimized for maximizing the Net Carbon Profit.*

| Parameter         | Description                                            | Initial range    | Timescale | Unit                                |
|-------------------|--------------------------------------------------------|------------------|-----------|-------------------------------------|
| $c_{\lambda f,p}$ | water use parameter perennial vegetation               | 0.0 - 10000.0    | Long-term | $\text{mol mol}^{-1} \text{m}^{-1}$ |
| $c_{\lambda e,p}$ | water use parameter perennial vegetation               | -3.0 - 0.0       | Long-term | -                                   |
| $c_{\lambda f,s}$ | water use parameter seasonal vegetation                | 0.0 - 10000.0    | Long-term | $\text{mol mol}^{-1} \text{m}^{-1}$ |
| $c_{\lambda e,s}$ | water use parameter seasonal vegetation                | -3.0 - 0.0       | Long-term | -                                   |
| $M_{A,p}$         | fractional cover perennial vegetation                  | 0 - 1            | Long-term | -                                   |
| $y_{r,p}$         | rooting depth perennial vegetation                     | 1.0 - 9.0        | Long-term | m                                   |
| $y_{r,s}$         | rooting depth seasonal vegetation                      | 0.05 - 2         | Long-term | m                                   |
| $M_{A,s}$         | fractional cover seasonal vegetation                   | 0.00 - (1.0-pct) | Daily     | -                                   |
| $J_{max25,p}$     | electron transport capacity perennial vegetation       | -                | Daily     | $\text{mol s}^{-1} \text{m}^{-2}$   |
| $J_{max25,s}$     | electron transport capacity annual vegetation          | -                | Daily     | $\text{mol s}^{-1} \text{m}^{-2}$   |
| $G_{s,p}$         | stomatal conductance perennial vegetation              | -                | Daily     | $\text{mol s}^{-1} \text{m}^{-2}$   |
| $G_{s,s}$         | stomatal conductance seasonal vegetation               | -                | Daily     | $\text{mol s}^{-1} \text{m}^{-2}$   |
| $S_{Adr,i,s}$     | root surface area distribution of perennial vegetation | -                | Daily     | $\text{m}^2 \text{m}^{-3}$          |
| $S_{Adr,i,s}$     | root surface area distribution of annual vegetation    | -                | Daily     | $\text{m}^2 \text{m}^{-3}$          |

**Table S6.2.** Soil characteristics of the study sites along the North Australian Tropical Transect, based on data from the Soil and Landscape Grid of Australia Viscarra Rossel et al. (2014a, b, c), in addition to field measurements of J. Beringer and L. B. Hutley. Here,  $\theta_r$  refers to the residual moisture content,  $\theta_s$  the saturated water content,  $\alpha$  and  $n$  the Van Genuchten soil parameters and  $K_{sat}$  the saturated hydraulic conductivity.

| Howard Springs | Soil type       | $\theta_r$ (-) | $\theta_s$ (-) | $\alpha$ (1/m) | $n$ (-) | $K_{sat}$ (m/s)   |
|----------------|-----------------|----------------|----------------|----------------|---------|-------------------|
| 0.00-0.20m     | Sandy Loam      | 0.065          | 0.41           | 7.5            | 1.89    | $1.228 * 10^{-5}$ |
| 0.20-0.40m     | Sandy Loam      | 0.065          | 0.41           | 7.5            | 1.89    | $1.228 * 10^{-5}$ |
| 0.40-0.60m     | Sandy Clay Loam | 0.1            | 0.39           | 5.9            | 1.48    | $3.639 * 10^{-6}$ |
| 0.60-bedrock   | Sandy Clay Loam | 0.1            | 0.39           | 5.9            | 1.48    | $3.639 * 10^{-6}$ |
| Adelaide River |                 |                |                |                |         |                   |
| 0.00-0.20m     | Silt Loam       | 0.067          | 0.45           | 2              | 1.41    | $1.25 * 10^{-6}$  |
| 0.20-0.40m     | Sandy Clay Loam | 0.1            | 0.39           | 5.9            | 1.48    | $3.639 * 10^{-6}$ |
| 0.40-0.60m     | Sandy Clay Loam | 0.1            | 0.39           | 5.9            | 1.48    | $3.639 * 10^{-6}$ |
| 0.60-bedrock   | Sandy Clay Loam | 0.1            | 0.39           | 5.9            | 1.48    | $3.639 * 10^{-6}$ |
| Daly River     |                 |                |                |                |         |                   |
| 0.00-0.20m     | Sandy Loam      | 0.065          | 0.41           | 7.5            | 1.89    | $1.228 * 10^{-5}$ |
| 0.20-0.40m     | Loamy Sand      | 0.057          | 0.41           | 12.4           | 2.28    | $4.053 * 10^{-6}$ |
| 0.40-0.60m     | Sandy Loam      | 0.065          | 0.41           | 7.5            | 1.89    | $1.228 * 10^{-5}$ |
| 0.60-bedrock   | Sandy Clay Loam | 0.1            | 0.39           | 5.9            | 1.48    | $3.639 * 10^{-6}$ |
| Dry River      |                 |                |                |                |         |                   |
| 0.00-0.20m     | Sandy Loam      | 0.065          | 0.41           | 7.5            | 1.89    | $1.228 * 10^{-5}$ |
| 0.20-0.40m     | Sandy Clay Loam | 0.1            | 0.39           | 5.9            | 1.48    | $3.639 * 10^{-6}$ |
| 0.40-0.60m     | Sandy Clay      | 0.1            | 0.38           | 2.7            | 1.23    | $3.333 * 10^{-6}$ |
| 0.60-bedrock   | Sandy Clay      | 0.1            | 0.38           | 2.7            | 1.23    | $3.333 * 10^{-6}$ |
| Sturt Plains   |                 |                |                |                |         |                   |
| 0.00-0.20m     | Silt Loam       | 0.067          | 0.45           | 2              | 1.41    | $1.25 * 10^{-6}$  |
| 0.20-0.40m     | Sandy Clay      | 0.1            | 0.38           | 2.7            | 1.23    | $3.333 * 10^{-6}$ |
| 0.40-0.60m     | Sandy Clay      | 0.1            | 0.38           | 2.7            | 1.23    | $3.333 * 10^{-6}$ |
| 0.60-bedrock   | Sandy Clay      | 0.1            | 0.38           | 2.7            | 1.23    | $3.333 * 10^{-6}$ |

## 2 FLEX Model Details

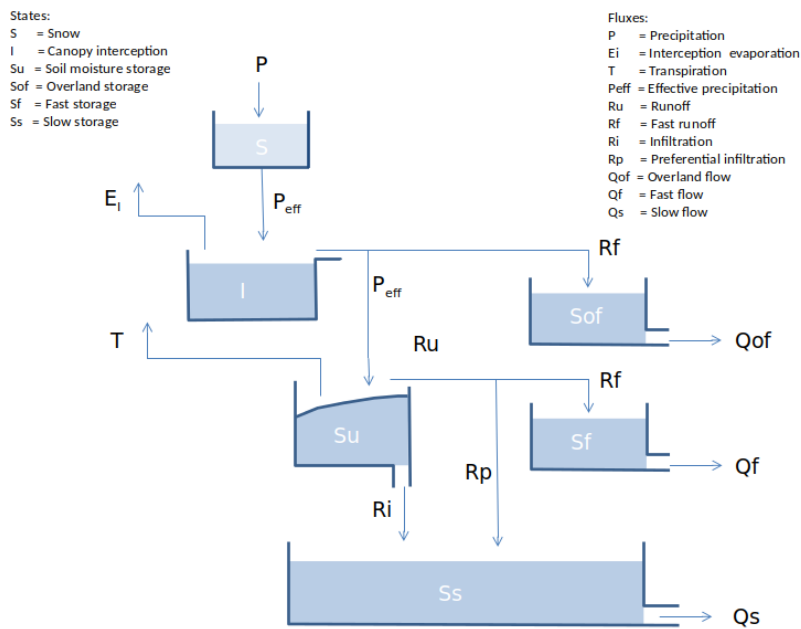

**Figure S6.2.** Model structure of the FLEX model

**Table S6.3.** Calibrated parameters in the FLEX model.

| Parameter  | Description                                                                  | Initial range | Unit                 |
|------------|------------------------------------------------------------------------------|---------------|----------------------|
| Meltfactor | water released with per degree change in temperature                         | 0.0 - 4.0     | mm °C                |
| Tthresh    | threshold temperature to separate rain from snow                             | -5.0 - 0.0    | °C                   |
| Imax       | maximum interception capacity                                                | 0.0 - 50.0    | mm                   |
| Sumax      | mxaimum root zone storage capacity                                           | 1.0 - 1000.0  | mm                   |
| beta       | shape factor soil moisture function                                          | 0.01 - 20     | -                    |
| Kf         | recession coefficient fast reservoir                                         | 1.0 - 30.0    | days                 |
| Ks         | recession coefficient slow reservoir                                         | 30.0 - 1000.0 | days                 |
| LP         | filling of soil moisture after which transpiration equals the potential rate | 0.00 - 1.0    | -                    |
| D          | partition of runoff that preferentially percolates to the groundwater        | 0.0 - 1.0     | -                    |
| Pmax       | maximum percolation to the groundwater                                       | 0.0 - 50.0    | mm day <sup>-1</sup> |
| Tlagf      | lag in fast flows                                                            | 0.0 - 50.0    | days                 |
| Tlags      | lag in slow flows                                                            | 0.0 - 50.0    | days                 |
| InfMax     | maximum infiltration                                                         | 1.0 - 200.0   | mm/day               |
| Kof        | recession coefficient overland flow reservoir                                | 1.0 - 20.0    | days                 |

45 **3 TUV Model Details**

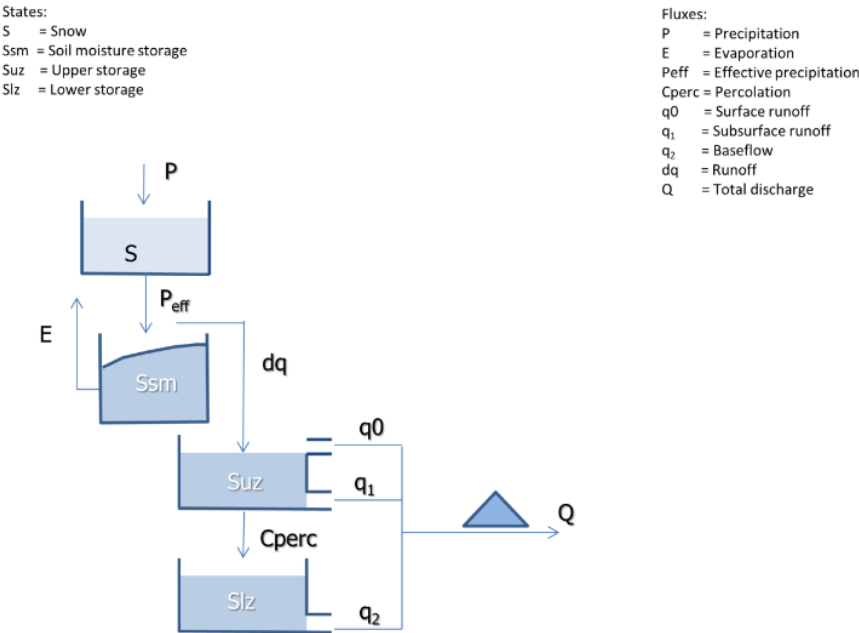

**Figure S6.3.** Model structure of the TUV model, taken from the supplement of Nijzink et al. (2016)

**Table S6.4.** Calibrated parameters in the TUW model.

| Parameter | Description                                              | Initial range | Unit                                  |
|-----------|----------------------------------------------------------|---------------|---------------------------------------|
| SCF       | snow correction factor                                   | 0.9 - 1.5     | -                                     |
| DDF       | degree day factor                                        | 0.0 - 5.0     | mm °C <sup>-1</sup> day <sup>-1</sup> |
| Tr        | threshold temperature above which precipitation is rain  | 1.0 - 3.0     | °C                                    |
| Ts        | threshold temperature below which precipitation is snow  | -3.0 - 1.0    | °C                                    |
| Tm        | threshold temperature above which melt starts            | -2.0 - 2.0    | °C                                    |
| LPrat     | parameter related to the limit for potential evaporation | 0.00 - 1.0    | -                                     |
| FC        | field capacity, max. soil moisture storage               | 0.0 - 600.0   | mm                                    |
| BETA      | non linear parameter for runoff production               | 0.00 - 20.0   | -                                     |
| K0        | storage coefficient for very fast response               | 0.0 - 2.0     | days                                  |
| K1        | storage coefficient for fast response                    | 2.0 - 30.0    | days                                  |
| K2        | storage coefficient for fast response                    | 30.0 - 250.0  | days                                  |
| lsuz      | threshold storage state very fast response               | 1.0 - 100.0   | mm                                    |
| cperc     | constant percolation rate                                | 0.0 - 8.0     | mm day <sup>-1</sup>                  |
| bmax      | maximum base at low flows                                | 0.0 - 30.0    | days                                  |
| croute    | free scaling parameter                                   | 0.0 - 50.0    | days <sup>2</sup> mm <sup>-1</sup>    |

**4 GR4J Model Details**

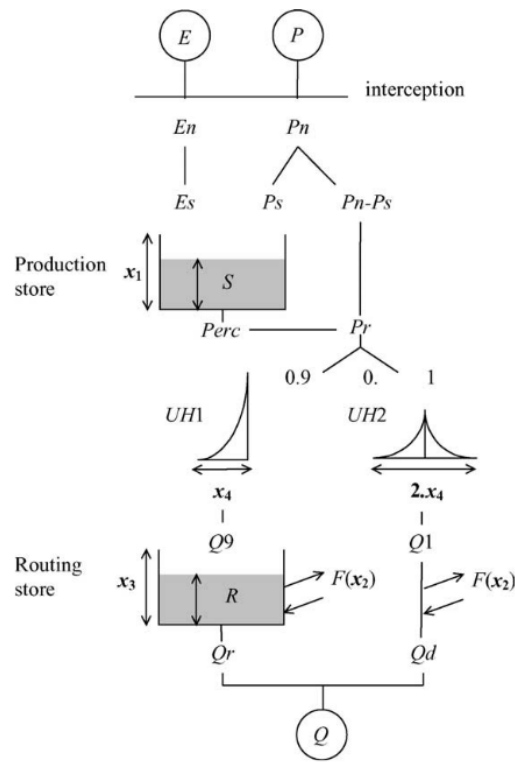

**Figure S6.4.** Model structure of the GR4J model, taken from Perrin et al. (2003)

**Table S6.5.** *Calibrated parameters in the GR4J model.*

| Parameter       | Description                                         | Initial range | Unit                                  |
|-----------------|-----------------------------------------------------|---------------|---------------------------------------|
| CemaNeige $x_1$ | weighting coefficient for snow pack thermal state   | 100 - 1200    | -                                     |
| CemaNeige $x_2$ | degree-day melt coefficient                         | -5.0 - 3.0    | mm °C <sup>-1</sup> day <sup>-1</sup> |
| $x_1$           | maximum capacity of the production store            | 20 - 300      | mm                                    |
| $x_2$           | groundwater exchange coefficient                    | 1.1 - 2.9     | mm day <sup>-1</sup>                  |
| $x_3$           | one day ahead maximum capacity of the routing store | 0.0 - 1.0     | mm                                    |
| $x_4$           | time base of unit hydrograph UH1                    | 0.0 - 5.0     | days                                  |

## References

- Nijzink, R., Hutton, C., Pechlivanidis, I., Capell, R., Arheimer, B., Freer, J., Han, D., Wagener, T., McGuire, K., Savenije, H., and Hrachowitz, M.: The evolution of root-zone moisture capacities after deforestation: a step towards hydrological predictions under change?, *Hydrology and Earth System Sciences*, 20, 4775–4799, <https://doi.org/10.5194/hess-20-4775-2016>, 2016.
- 50 Nijzink, R. C., Beringer, J., Hutley, L. B., and Schymanski, S. J.: Influence of modifications (from AoB2015 to v0.5) in the Vegetation Optimality Model, *Geoscientific Model Development*, 15, 883–900, <https://doi.org/10.5194/gmd-15-883-2022>, 2022.
- Perrin, C., Michel, C., and Andréassian, V.: Improvement of a parsimonious model for streamflow simulation, *Journal of Hydrology*, 279, 275–289, [https://doi.org/10.1016/S0022-1694\(03\)00225-7](https://doi.org/10.1016/S0022-1694(03)00225-7), 2003.
- 55 Schymanski, S. J., Roderick, M. L., Sivapalan, M., Hutley, L. B., and Beringer, J.: A test of the optimality approach to modelling canopy properties and CO<sub>2</sub> uptake by natural vegetation, *Plant, Cell & Environment*, 30, 1586–1598, <https://doi.org/10.1111/j.1365-3040.2007.01728.x>, 2007.
- Schymanski, S. J., Sivapalan, M., Roderick, M. L., Hutley, L. B., and Beringer, J.: An optimality-based model of the dynamic feedbacks between natural vegetation and the water balance, *Water Resources Research*, 45, W01 412, <https://doi.org/10.1029/2008WR006841>, 60 2009.
- Viscarra Rossel, R., Chen, C., Grundy, M., Searle, R., Clifford, D., Odgers, N., Holmes, K., Griffin, T., Liddicoat, C., and Kidd, D.: Soil and Landscape Grid National Soil Attribute Maps - Clay (3" resolution) - Release 1, <https://doi.org/10.4225/08/546EEE35164BF>, type: dataset, 2014a.
- Viscarra Rossel, R., Chen, C., Grundy, M., Searle, R., Clifford, D., Odgers, N., Holmes, K., Griffin, T., Liddicoat, C., and Kidd, D.: Soil and Landscape Grid National Soil Attribute Maps - Silt (3" resolution) - Release 1, <https://doi.org/10.4225/08/546F48D6A6D48>, type: 65 dataset, 2014b.
- Viscarra Rossel, R., Chen, C., Grundy, M., Searle, R., Clifford, D., Odgers, N., Holmes, K., Griffin, T., Liddicoat, C., and Kidd, D.: Soil and Landscape Grid National Soil Attribute Maps - Sand (3" resolution) - Release 1, <https://doi.org/10.4225/08/546F29646877E>, type: dataset, 2014c.
- 70 von Caemmerer, S.: Biochemical Models of Leaf Photosynthesis, vol. 2 of *Techniques in Plant Sciences*, CSIRO Publishing, Collingwood, DOI 10.1071/9780643103405, 2000.
